# Supplementary material for: Polymer field-effect transistor memory based on a ferroelectric nylon gate insulator
Source: Royal Society of Chemistry journal article supplement (doi:10.1039/c9tc06868f), 2020-01-01
Supplement: c9tc06868f1.pdf [file c9tc06868f1.pdf]

## Supplementary Information

### Polymer Field-Effect Transistor Memory Based on Ferroelectric Nylon Gate Insulator

Saleem Anwar,<sup>ab†</sup> Beomjin Jeong,<sup>a†</sup> Mohammad Mahdi Abolhasani,<sup>ac</sup> Wojciech Zajaczkowski,<sup>a</sup> Morteza Hassanpour Amiri<sup>a</sup> and Kamal Asadi\*<sup>a</sup>

a. Max Planck Institute for Polymer Research, Ackermannweg 10, 55128 Mainz, Germany.

b. School of Chemical & Materials Engineering, National University of Sciences & Technology, Sector H-12, Islamabad, Pakistan.

c. Chemical Engineering Department, University of Kashan, 8731753153, Kashan, Iran.

† These authors contributed equally to this work.

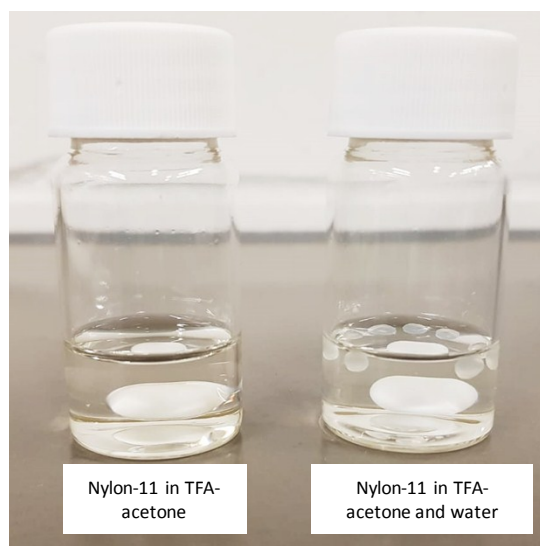

**Figure S1.** Photograph of nylon-11 in TFA:acetone (left) and TFA:acetone/water (50/50 mol %) mixture (right) after 1 hour of stirring at room temperature. Nylon-11 pellets completely dissolved in TFA:acetone, whereas, the pellets remained undissolved in TFA:acetone and water mixture.
